# Supplementary material for: Electroluminescent poly(fluorene-co-thiophene-S,S-dioxide): synthesis, characterisation and structure–property relationshipsElectronic supplementary information (ESI) available: crystal structure of model compound and comparison of its absorption and luminescence spectra. See http://www.rsc.org/suppdata/jm/b2/b208742a/
Source: Royal Society of Chemistry journal article supplement (doi:10.1039/b208742a), 2003-02-27
Supplement: b208742a.doc [file b208742a.doc]

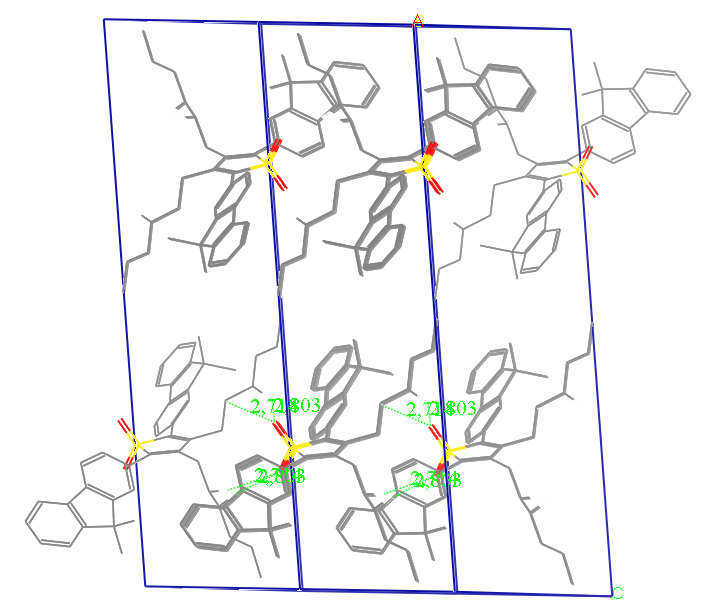


Crystal structure of model compound as viewed along [1 1 0] direction, *b & c* diagonal .

The strong interactions among CH2 of hexyl chains and O of S,S dioxothiophene residue of the adjacent molecule are indicated (the distances range from 2.7 to 2.8 Å).

Absorption (a.u.)

Luminescence (a.u.)

Comparison among both absorption and luminescence spectra in solution of PFTS .
